# Supplementary material for: Evaluation of Soil Total Nitrogen as an Indicator of Soil Bacterial Community Response to Biochar and Plant Growth-Promoting Rhizobacteria Applications
Source: MDPI journal article supplement (doi:10.3390/agronomy14030428), 2024-02-22
Supplement: s1 [file s1]

## Supplementary Materials

### Formula S1

$$AWCD = \sum (C_i - R_i) / n;$$

Where  $C_i$  is the absorbance value of each carbon source well,  $R_i$  is the absorbance value of each blank control well,  $n$  is the number of carbon source wells. In the test, the value is 31.

### Formula S2

$$\text{Simpson}_{\text{MF}} \text{ index}(D) = 1 - \sum P_i^i;$$

Where  $C_i$  is the absorbance value of each carbon source well,  $R_i$  is the absorbance value of each blank control well.  $P_i = (C_i - R_i) / \sum (C_i - R_i)$ .

### Formula S3

$$\text{Shannon}_{\text{MF}} \text{ index } (H) = - \sum P_i \times \ln(P_i);$$

Where  $C_i$  is the absorbance value of each carbon source well,  $R_i$  is the absorbance value of each blank control well.  $P_i = (C_i - R_i) / \sum (C_i - R_i)$ .

### Formula S4

$$\text{McIntosh index } (U) = \sqrt{\sum (C_i - R_i)^2};$$

Where  $C_i$  is the absorbance value of each carbon source well,  $R_i$  is the absorbance value of each blank control well.

### Formula S5

$$H_{\text{shannon}} = - \sum_{i=1}^{S_{\text{obs}}} \frac{n_i}{N} \ln \frac{n_i}{N};$$

Where  $S_{\text{obs}}$  = number of observed OTUs;  $n_i$  = number of OTUs containing  $i$  sequences;  $N$  = number of all sequences.

### Formula S6

$$D_{\text{simpson}} = 1 - \frac{\sum_{i=1}^{S_{\text{obs}}} n_i (n_i - 1)}{N(N - 1)};$$

Where  $S_{\text{obs}}$  = number of observed OTUs;  $n_i$  = number of OTUs containing  $i$  sequences;  $N$  = number of all sequences.

**Formula S7-S11**

$$S_{ACE} = \begin{cases} S_{abund} + \frac{s_{rare}}{C_{ACE}} + \frac{n_1}{C_{ACE}}, & \text{for } \hat{\gamma}_{ACE}^2 < 0.80 \\ S_{abund} + \frac{s_{rare}}{C_{ACE}} + \frac{n_1}{C_{ACE}}, & \text{for } \hat{\gamma}_{ACE}^2 \geq 0.80 \end{cases};$$

$$C_{ACE} = \frac{n_1}{N_{rare}}, \quad N_{rare} = \sum_{i=1}^{abund} i n_i;$$

$$\hat{\gamma}_{ACE}^2 = \max \left[ \frac{S_{rare} \sum_{i=1}^{abund} i(i-1) n_i}{C_{ACE} N_{rare} (N_{rare} - 1)} - 1, 0 \right];$$

$$\hat{\gamma}_{ACE}^2 = \max \left[ \hat{\gamma}_{ACE}^2 \left\{ 1 + \frac{N_{rare} (1 - C_{ACE}) \sum_{i=1}^{abund} i(i-1) n_i}{N_{rare} (N_{rare} - C_{ACE})} \right\}, 0 \right];$$

Where  $n_i$  is the number of OTU with  $i$  sequences,  $S_{rare}$  is the number of OTU with or less than "abund" sequences,  $S_{abund}$  is the number of OTU more than "abund" sequences, abund is the threshold of dominate OTU and default to be 10.

**Formula S12**

$$S_{chao1} = S_{obs} + \frac{n_1(n_1 - 1)}{2(n_2 + 1)};$$

Where  $S_{chao1}$  = estimated number of OTUs;  $S_{obs}$  = observed number of OTUs;  $n_1$  = number of OTUs with only one sequence (e.g., "singletons");  $n_2$  = number of OTUs with only two sequences (e.g., "doublets").

**Table S1.** Main technical specifications of the biochar under study.

| Stationary Carbon     | TN                    | Av.P/TP               | Olsenk/TK             | Bulk                  | Gross                              | pH    | EC                     | Specific surface      | CEC                |
|-----------------------|-----------------------|-----------------------|-----------------------|-----------------------|------------------------------------|-------|------------------------|-----------------------|--------------------|
| (g·kg <sup>-1</sup> ) | porosity                           |       | (mS·cm <sup>-1</sup> ) | area                  | (Cmol·             |
|                       |                       |                       |                       |                       | (m <sup>2</sup> ·g <sup>-1</sup> ) |       |                        | (g·cm <sup>-1</sup> ) | Kg <sup>-1</sup> ) |
| 650                   | 0                     | 10.2                  | 55.65                 | 0.19                  | 67.03                              | 10.24 | 4.68                   | 9                     | 60.8               |

**Table S2.** PCR primer of bacteria.

| Target gene             | Primer | Sequence (5'–3')     |
|-------------------------|--------|----------------------|
| Bacterial 16s rRNA gene | 338F   | ACTCCTACGGGAGGCAGCAG |
|                         | 806R   | GGACTACHVGGGTWTCTAAT |

**Table S3.** PCR reaction system and amplification program of bacteria.

| PCR Reaction System<br>(20 $\mu$ L) | Addition ( $\mu$ L) | Amplification System                      |
|-------------------------------------|---------------------|-------------------------------------------|
| 5 $\times$ FastPfu Buffer           | 4                   | Denaturation at 95 $^{\circ}$ C for 3 min |
| 2.5mM dNTPs                         | 2                   | Degeneration at 95 $^{\circ}$ C for 30 s  |
| Forward Primer (5 $\mu$ M)          | 0.8                 | Annealing at 55 $^{\circ}$ C for 30 s     |
| Reverse Primer (5 $\mu$ M)          | 0.8                 | Extension at 72 $^{\circ}$ C for 45 s     |
| FastPfu Polymerase                  | 0.4                 | 25 recycling                              |
| BSA                                 | 0.2                 | Extension at 72 $^{\circ}$ C for 10 min   |
| Template DNA                        | 10 ng               |                                           |
| Add ddH <sub>2</sub> O to           | 20                  | Stored at 10 $^{\circ}$ C                 |

**Table S4.** Mean values ( $\pm$  standard error) of diversity of soil microbial functional after biochar and PGPR treatments. Average well colour development (*AWCD*), Simpson index of soil microbial functional diversity (*Simpson<sub>MF</sub>*), Shannon index of soil microbial functional diversity (*Shannon<sub>MF</sub>*). Four treatments were set up as no biochar and no PGPR (M0B0, referred to as the control),  $5 \times 10^{10}$  CFU·mL<sup>-1</sup> PGPR-only (MB0), 20 t·hm<sup>-2</sup> biochar-only (B20), and co-application of 20 t·hm<sup>-2</sup> biochar and  $5 \times 10^{10}$  CFU·mL<sup>-1</sup> PGPR (MB20). Lowercase letters represent the significant differences between samples.

| Treatments | <i>AWCD</i>     | <i>Simpson<sub>MF</sub></i> | <i>Shannon<sub>MF</sub></i> | McIntosh        |
|------------|-----------------|-----------------------------|-----------------------------|-----------------|
| M0B0       | 0.47 $\pm$ 0.72 | 0.93 $\pm$ 0.01             | 2.89 $\pm$ 0.10             | 3.88 $\pm$ 0.43 |
| MB0        | 0.81 $\pm$ 0.14 | 0.95 $\pm$ 0.00             | 3.10 $\pm$ 0.04             | 5.58 $\pm$ 0.83 |
| B20        | 0.69 $\pm$ 0.15 | 0.94 $\pm$ 0.01             | 3.00 $\pm$ 0.12             | 4.89 $\pm$ 0.89 |
| MB20       | 0.35 $\pm$ 0.13 | 0.90 $\pm$ 0.04             | 2.57 $\pm$ 0.32             | 2.95 $\pm$ 0.83 |

**Table S5.** Carbon sources with contribution rates for principal component 1 (PC1) and principal component 2 (PC2) in soils treated by biochar-only, PGPR only, co-application of biochar and PGPR, and the control.

| Carbon Type     | Order | Carbon Source                    | PC1      | PC2      |
|-----------------|-------|----------------------------------|----------|----------|
| Carbohydrate    | C6    | D-cellose                        | 0.29389  | -0.03607 |
|                 | C7    | a-D-lactose                      | 0.18621  | 0.12491  |
|                 | C8    | $\beta$ -menthyl-D-glycoside     | 0.30031  | 0.10047  |
|                 | C9    | D-xylose                         | 0.02948  | -0.30854 |
|                 | C10   | L-erthritol                      | 0.08143  | -0.14113 |
|                 | C11   | D-mannitol                       | 0.0083   | -0.1521  |
|                 | C12   | N-acetyl-D-glucosamine           | 0.06726  | 0.01534  |
|                 | C14   | Glucose-1-phosphate              | 0.19044  | 0.21387  |
|                 | C15   | D,L-a-glycerol                   | 0.29738  | -0.0746  |
|                 | C16   | D-glactonicacid $\gamma$ lactone | 0.19152  | 0.16068  |
|                 | C24   | L-arginine                       | -0.09396 | 0.23244  |
|                 | C25   | L-asparagine                     | 0.17174  | 0.18846  |
| Amino acid      | C26   | L-phenylalanine                  | -0.06745 | 0.27655  |
|                 | C27   | L-serine                         | 0.19585  | -0.09948 |
|                 | C28   | L-threonine                      | 0.02905  | 0.18409  |
|                 | C29   | Glycyl-L-glutamate               | 0.25994  | 0.12178  |
|                 | C1    | Methyl pyruvate                  | 0.24289  | -0.03185 |
| Carboxylic acid | C20   | r-hydroxybutyric acid            | 0.06854  | -0.31644 |
|                 | C21   | Itaconic acid                    | -0.15388 | -0.18206 |
|                 | C22   | a-ketobutyric acid               | 0.18461  | -0.27264 |
|                 | C23   | D-malic acid                     | 0.25991  | -0.05554 |
|                 | C13   | D-glucosaminicacid               | 0.19044  | 0.21387  |
|                 | C17   | D-galactose                      | 0.31627  | -0.04389 |
| Multipoymer     | C2    | Tween 40                         | 0.22514  | 0.20464  |
|                 | C3    | Tween 80                         | 0.02919  | 0.01761  |
|                 | C4    | a-cyclodextrin                   | -0.21634 | 0.11106  |
|                 | C5    | Glycogenin                       | -0.16606 | 0.10758  |

| Carbon Type  | Order | Carbon Source          | PC1      | PC2      |
|--------------|-------|------------------------|----------|----------|
| Phenoliacids | C18   | 2-hydroxy-benzoic acid | 0.0788   | -0.25581 |
|              | C19   | 4-hydroxy-benzoic acid | -0.02845 | -0.05524 |
| Amines       | C30   | Phenylethylamine       | -0.03042 | -0.31867 |
|              | C31   | Putrescine             | 0.20406  | 0.04748  |



**Table S6.** Pearson's correlation coefficients of relative abundance and community composition of dominant bacteria and impact factors based on Mantel tests.

|                              | M0B0   |       | MB0    |       | B20   |       | MB20   |       |
|------------------------------|--------|-------|--------|-------|-------|-------|--------|-------|
|                              | r      | p     | r      | p     | r     | p     | r      | p     |
| NO <sub>3</sub> <sup>-</sup> | -0.149 | 0.835 | -0.207 | 0.889 | 0.127 | 0.038 | 0.250  | 0.002 |
| NH <sub>4</sub> <sup>+</sup> | 0.135  | 0.169 | 0.064  | 0.307 | 0.198 | 0.051 | 0.153  | 0.177 |
| Soil TN                      | -0.248 | 0.990 | -0.241 | 0.967 | 0.541 | 0.002 | 0.726  | 0.001 |
| Soil TP                      | 0.147  | 0.175 | 0.183  | 0.099 | 0.291 | 0.029 | 0.082  | 0.296 |
| Soil TK                      | 0.349  | 0.017 | 0.244  | 0.039 | 0.037 | 0.511 | -0.221 | 0.926 |
| pH                           | -0.195 | 0.967 | -0.128 | 0.850 | 0.023 | 0.362 | 0.114  | 0.182 |
| EC                           | 0.005  | 0.443 | -0.177 | 0.802 | 0.074 | 0.308 | 0.089  | 0.362 |
| SWC                          | 0.138  | 0.123 | 0.083  | 0.218 | 0.068 | 0.233 | 0.201  | 0.064 |

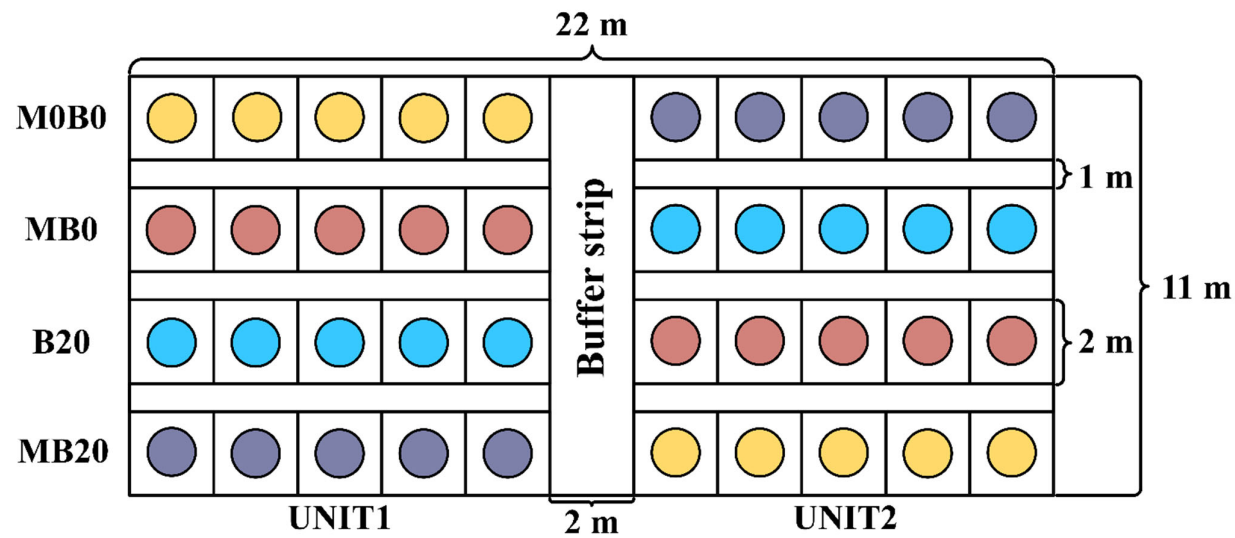

- No biochar and no PGPR (M0B0)
- 20 t·hm<sup>-2</sup> biochar-only (B20)
- 5×10<sup>10</sup> CFU·mL<sup>-1</sup> PGPR-only (MB0)
- Co-application of 20 t·hm<sup>-2</sup> biochar and 5×10<sup>10</sup> CFU·mL<sup>-1</sup> PGPR (MB20)

**Figure S1.** Experimental design in at Changke Forest Center. Two units were divided by a 2-m-width buffer strip. Each experimental unit was further divided into 5 columns. Each column was divided into 2 m × 2 m plots with 1m buffer strips between plots.

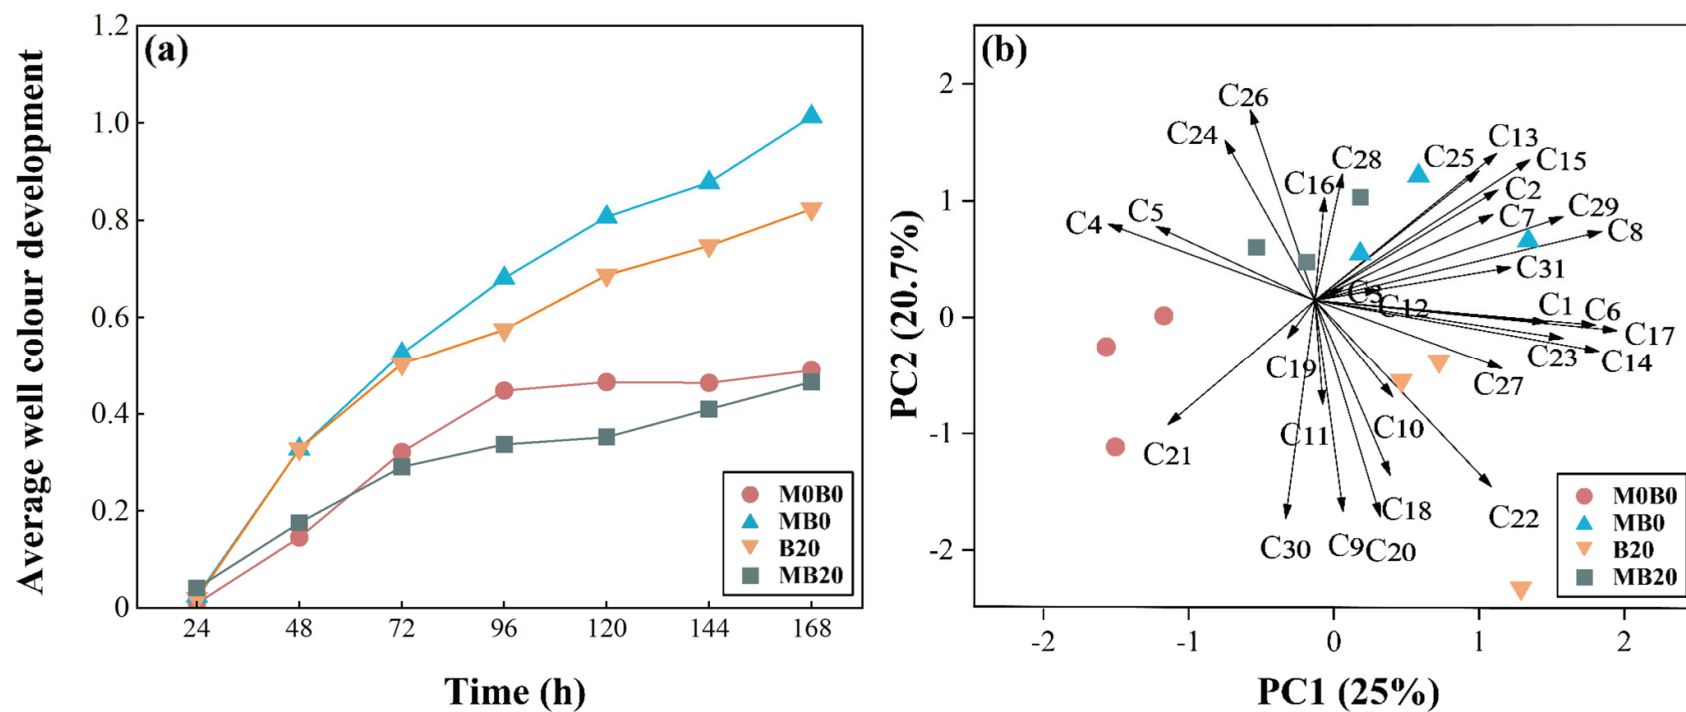

**Figure S2. (a)** Microbial metabolic activity of carbon sources in soil under M0B0, MB0, B20 and MB20 treatments, average well colour development (AWCD). **(b)** Principal component Analysis (PCA) of selected parameters measured on a grown under no biochar and no PGPR (M0B0),  $5 \times 10^{10}$  CFU·mL<sup>-1</sup> PGPR-only (MB0), 20 t·hm<sup>-2</sup> biochar-only (B20), and co-application of 20 t·hm<sup>-2</sup> biochar and  $5 \times 10^{10}$  CFU·mL<sup>-1</sup> PGPR (MB20). The parameters are: Methyl pyruvate (C1), Tween 40 (C2) Tween 80 (C3),  $\alpha$ -cyclodextrin (C4), Glycogenin (C5), D-cellose (C6),  $\alpha$ -D-lactose (C7),  $\beta$ -menthyl-D-glycoside (C8), D-xylose (C9), L-erthritol (C10), D-mannitol (C11), N-acetyl-D-glucosamine (C12), D-glucosaminic acid (C13), Glucose-1-phosphate (C14), D,L- $\alpha$ -glycerol (C15), D-galactonic acid  $\gamma$  lactone (C16), D-galactose (C17), 2-hydroxy-benzoic acid (C18), 4-hydroxy-benzoic acid (C19), r-hydroxybutyric acid (C20), Itaconic acid (C21),  $\alpha$ -ketobutyric acid (C22),

D-malic acid (C23), L-arginine (C24), L-asparagine (C25), L-phenylalanine (C26), L-serine (C27), L-threonine (C28), Glycyl-L-glutamate (C29), Phenylethylamine (C30), Putrescine (C31). The carbon sources listed as black arrows in the figure represented the contribution to PC1 & PC2. PC1 accounted for 25.0% of the variance, and PC2 accounted for 20.7%.
